# Supplementary material for: Identification of Molecular Profile of Ear Fibroblasts Derived from Spindle-Transferred Holstein Cattle with Ooplasts from Taiwan Yellow Cattle under Heat Stress
Source: MDPI journal article supplement (doi:10.3390/ani14091371), 2024-05-02
Supplement: s1 [file s1]

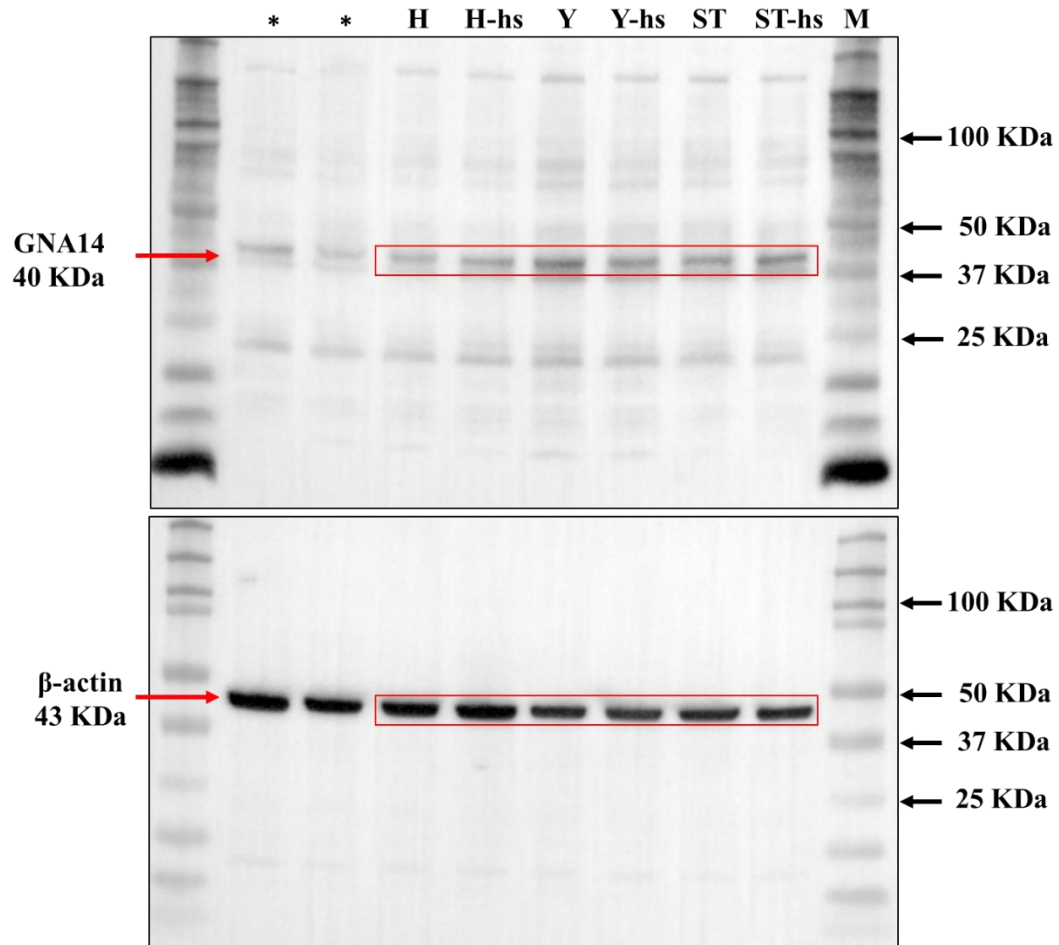

|               | H     | H-hs  | Y     | Y-hs  | ST    | ST-hs |
|---------------|-------|-------|-------|-------|-------|-------|
| GNA14/β-actin | 0.243 | 0.246 | 0.564 | 0.520 | 0.350 | 0.391 |

**Figure S4. Whole western blot and densitometry reading/intensity ratio of GNA14 and β-actin. The relative fold expression of GNA14 protein in ear fibroblasts derived from different cattle groups after heat-shock (42°C, 12 h). β-actin serves as the internal control. H: ear fibroblasts derived from Holstein cattle; Y: ear fibroblasts derived from Taiwan yellow cattle; ST: ear fibroblasts derived from ST cattle produced by the embryos reconstructed with Taiwan yellow cattle ooplasm and Holstein nucleus (ST-Hd-Yo). \* The left two lanes are samples from other experiment.**

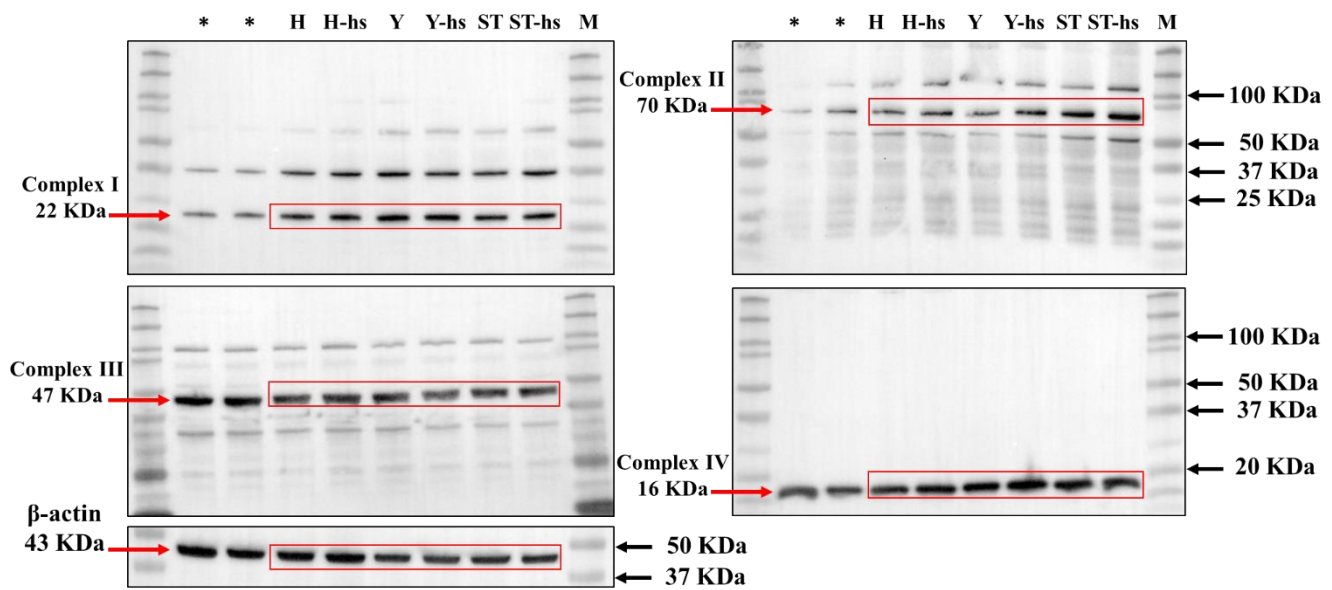

|                      | H     | H-hs  | Y     | Y-hs  | ST    | ST-hs |
|----------------------|-------|-------|-------|-------|-------|-------|
| Complex I /β-actin   | 0.704 | 0.627 | 0.869 | 0.938 | 0.868 | 0.848 |
| Complex II /β-actin  | 0.465 | 0.661 | 0.641 | 0.767 | 0.848 | 0.867 |
| Complex III /β-actin | 0.929 | 0.980 | 0.981 | 0.991 | 0.997 | 1.082 |
| Complex IV /β-actin  | 0.912 | 0.980 | 1.209 | 1.735 | 1.025 | 1.220 |

**Figure S5. Whole western blot and densitometry reading/intensity ratio of Complex-I, -II, -III, -IV and β-actin. The relative fold expression of Complex-I, -II, -III and -IV proteins in ear fibroblasts derived from different cattle groups after heat-shock (42°C, 12 h). β-actin serves as the internal control. H: ear fibroblasts derived from Holstein cattle; Y: ear fibroblasts derived from Taiwan yellow cattle; ST: ear fibroblasts derived from ST cattle produced by the embryos reconstructed with Taiwan yellow cattle ooplasm and Holstein nucleus (ST-Hd-Yo).**

**\*The left two lanes are samples from other experiment.**

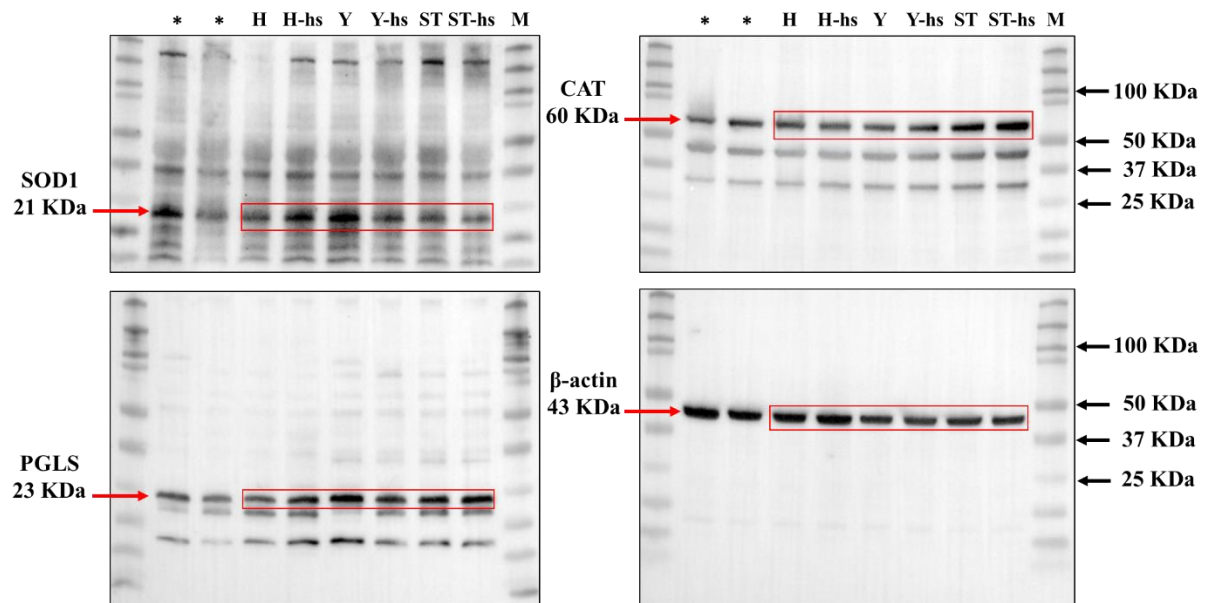

|                        | H     | H-hs  | Y     | Y-hs  | ST    | ST-hs |
|------------------------|-------|-------|-------|-------|-------|-------|
| SOD1/ $\beta$ -tubulin | 0.583 | 0.728 | 1.247 | 0.967 | 0.786 | 0.701 |
| CAT/ $\beta$ -tubulin  | 0.535 | 0.598 | 0.812 | 0.863 | 0.991 | 1.231 |
| PGLS/ $\beta$ -tubulin | 0.462 | 0.665 | 1.168 | 0.895 | 0.925 | 1.086 |

**Figure S7. Whole western blot and densitometry reading/intensity ratio of SOD1, CAT, PGLS and  $\beta$ -actin. The relative fold expression of SOD1, CAT and PGLS proteins in ear fibroblasts derived from different cattle groups after heat-shock (42°C, 12 h).  $\beta$ -actin serves as the internal control. H: ear fibroblasts derived from Holstein cattle; Y: ear fibroblasts derived from Taiwan yellow cattle; ST: ear fibroblasts derived from ST cattle produced by the embryos reconstructed with Taiwan yellow cattle ooplasm and Holstein nucleus (ST-Hd-Yo). \* The left two lanes are samples from other experiment.**
